# Supplementary material
Source: PubMed Central journal article supplement (PMC3293247)
Supplement: NIHMS354225-supplement-1_si_001.pdf [file NIHMS354225-supplement-1_si_001.pdf]

## Supporting Information

Figure S1.

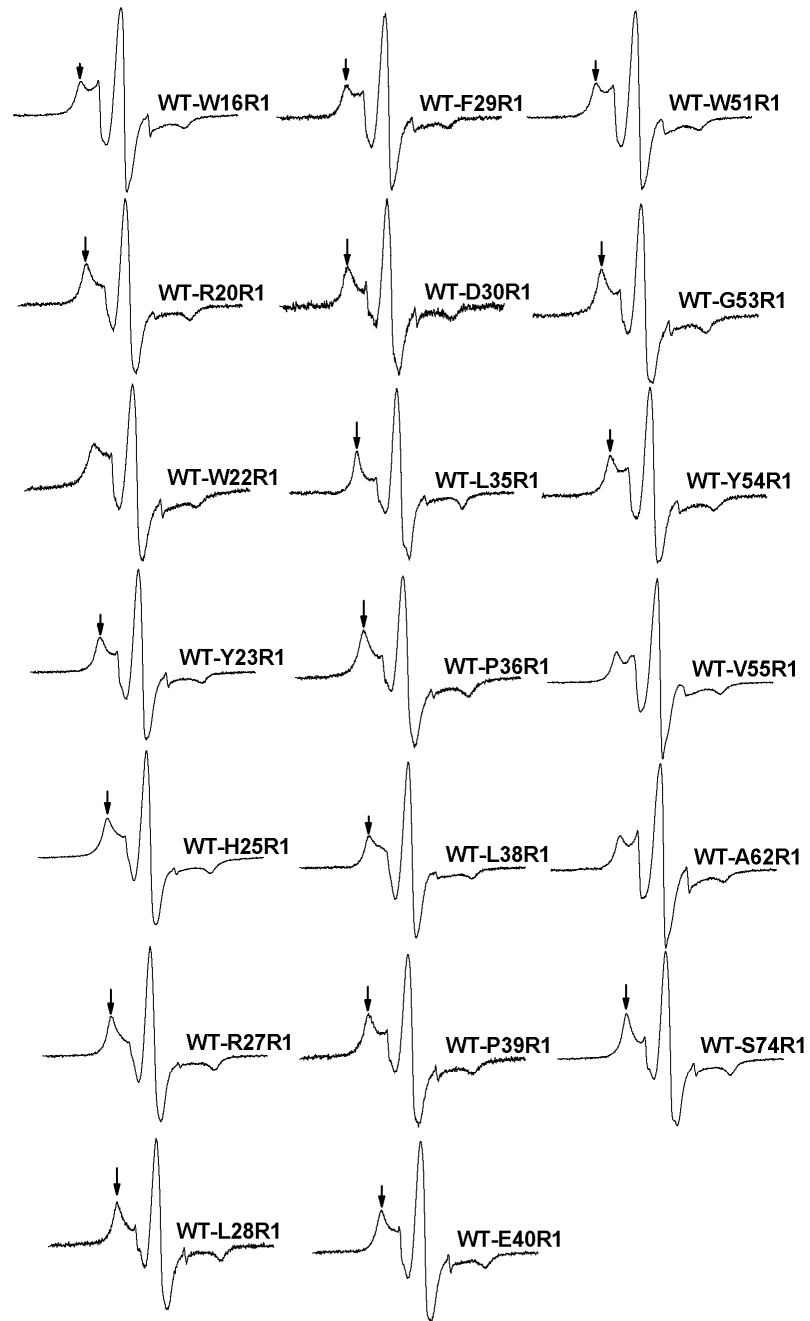

Representative EPR spectra of R1-labeled residues in the wild-type background. Arrows indicate the motionaly restricted components. All spectra were acquired at 50  $\mu\text{M}$  concentration and 150 G scan width.

**Figure S2.**

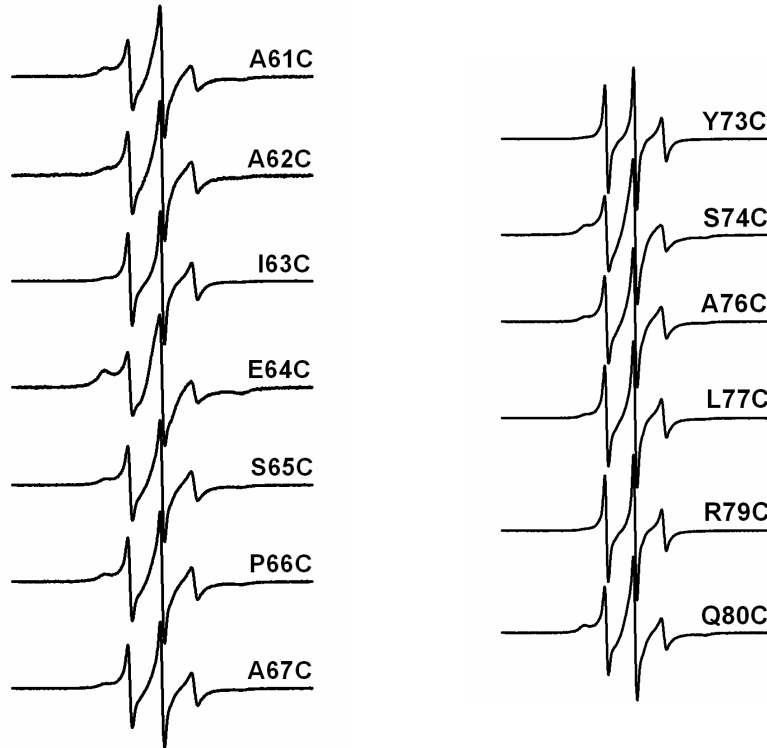

EPR spectra of R1-labeled residues 61 to 67 and 73 to 80. All spectra were acquired at 50  $\mu$ M concentration and 150 G scan width.

**Figure S3.**

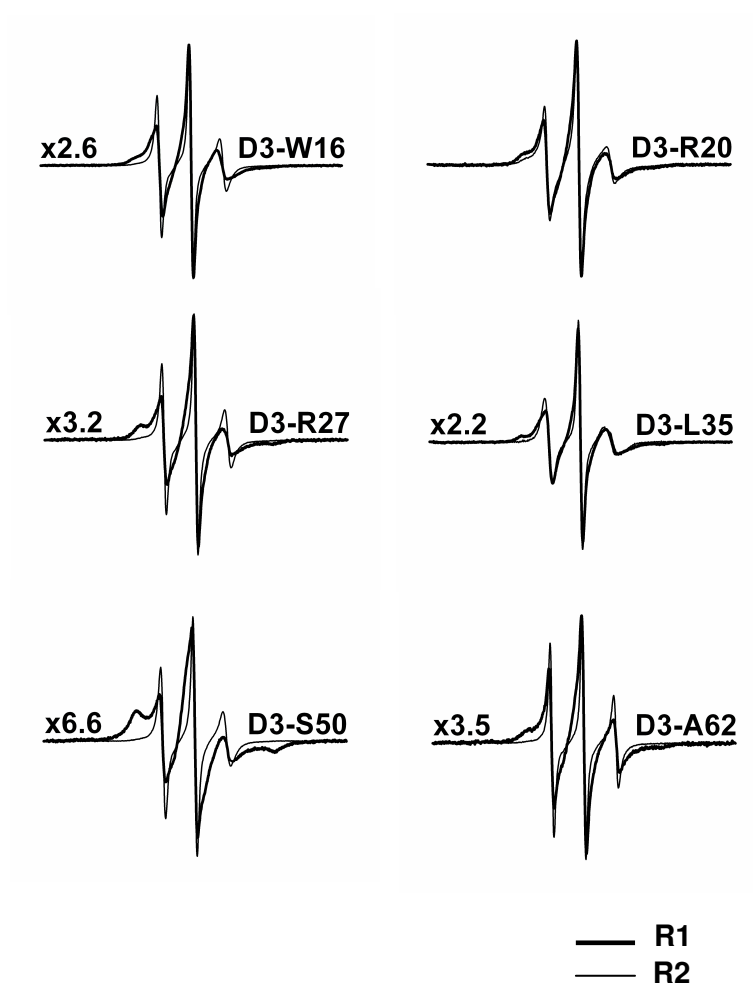

Representative EPR spectra of R1- and R2-labeled Hsp27-D3 mutants. The bold traces correspond to R1-labeled mutants and the light traces to R2-labeled mutants. R1-labeled mutants were scaled by the factor to the left of the spectrum. All spectra were acquired at 50  $\mu$ M concentration at 150 G scan width.

**Figure S4**

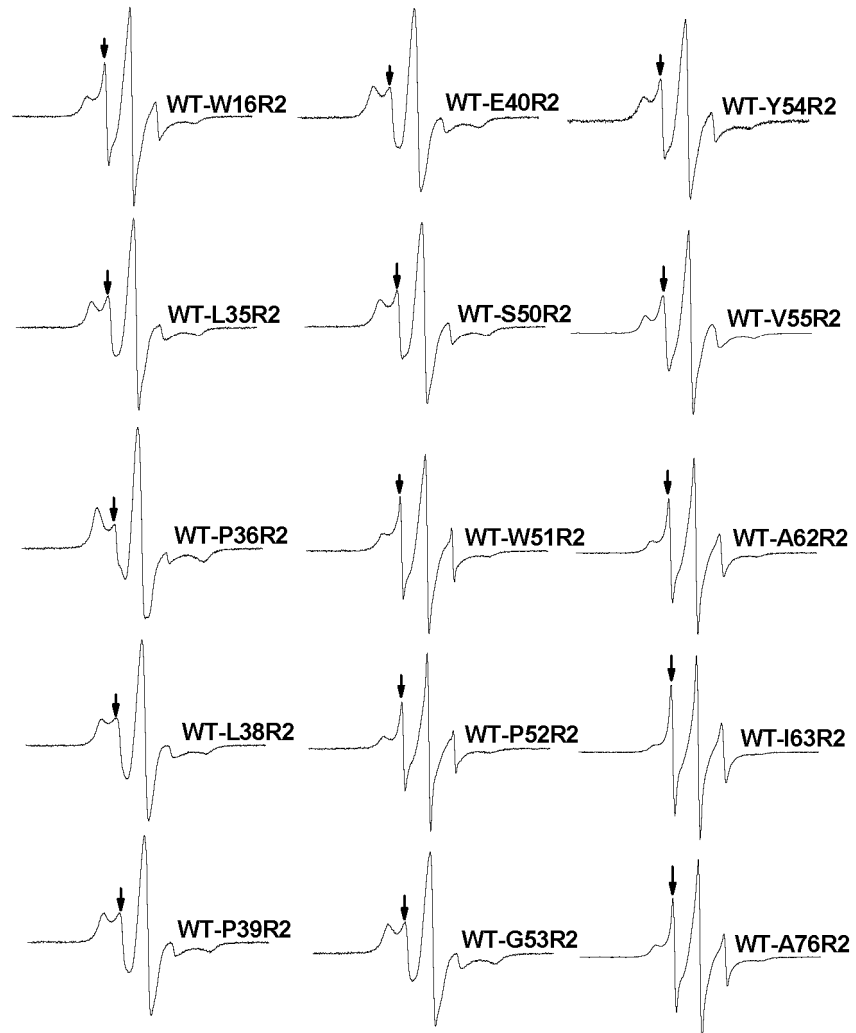

Representative EPR spectra of R2-labeled residues on the WT background. Arrows indicate the mobile component. All spectra were acquired at 50  $\mu$ M concentration and 150 G scan width.

**Figure S5.**

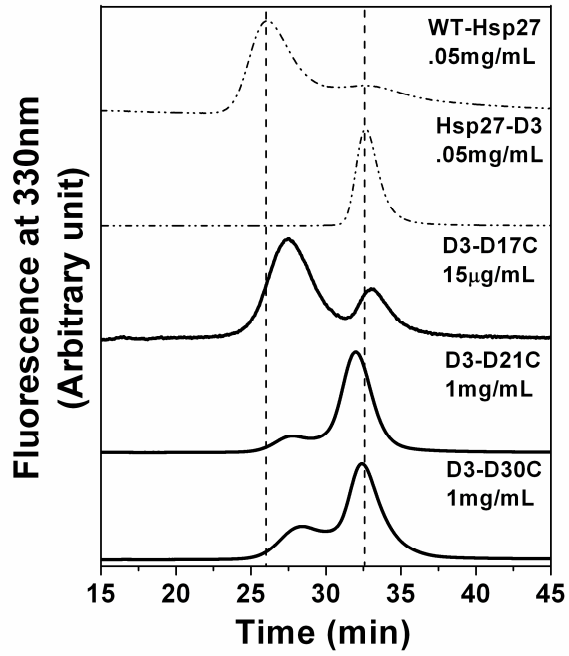

SEC chromatograms of D3-D17C, D3-D21C, and D3-D30C. All three traces were generated at 23°C, pH 7.2 with a flow rate of 0.5 mL/min.

Figure S6.

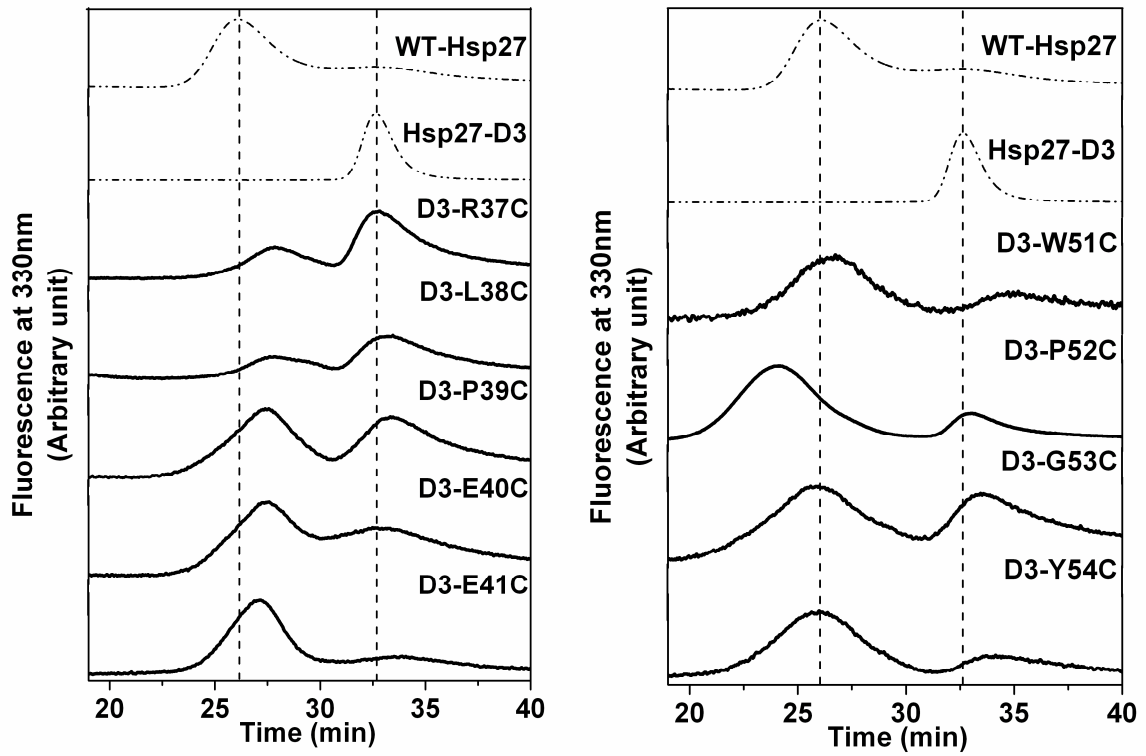

SEC chromatograms for residues that shift the dissociation equilibrium in favor of large assemblies. The protein concentration was 0.05 mg/ml and experiments were performed at 23°C, pH 7.2 with a flow rate of 0.5 mL/min.
